# Supplementary material for: Novel triazole-modified chitosan@nickel nanoparticles: efficient and recoverable catalysts for Suzuki reaction
Source: Royal Society of Chemistry journal article supplement (doi:10.1039/c6nj03789e), 2017-01-01
Supplement: c6nj03789e1.pdf [file c6nj03789e1.pdf]

# Supporting Information

## **Novel triazole-modified chitosan @ nickel nanoparticles: efficient and recoverable catalysts for Suzuki Reaction**

Abdol R. Hajipour<sup>1, 2\*</sup>, Parisa Abolfathi<sup>1</sup>

*<sup>1</sup>Pharmaceutical Research Laboratory, Department of Chemistry, Isfahan*

*University of Technology, Isfahan 84156, IR Iran, E-mail*

*<sup>2</sup>Department of Neuroscience, University of Wisconsin, Medical School, 1300 University*

*Avenue, Madison, 53706-1532, WI, USA*

---

\*Corresponding author: Tel.: + 98 313 391 3262; fax: + 98 313 391 2350; e-mail:

haji@cc.iut.ac.ir.

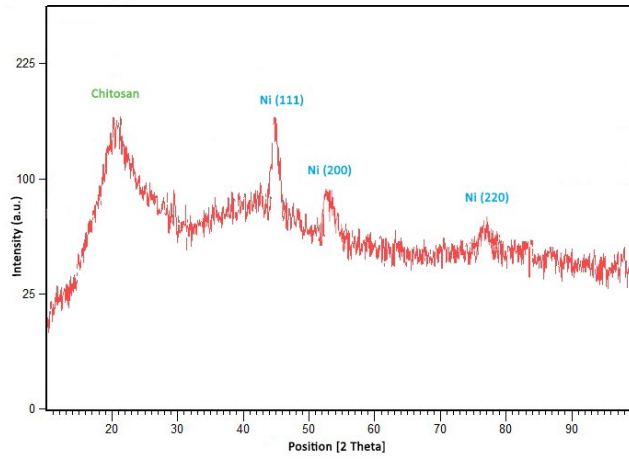

Fig S1 XRD pattern of the recovered catalyst

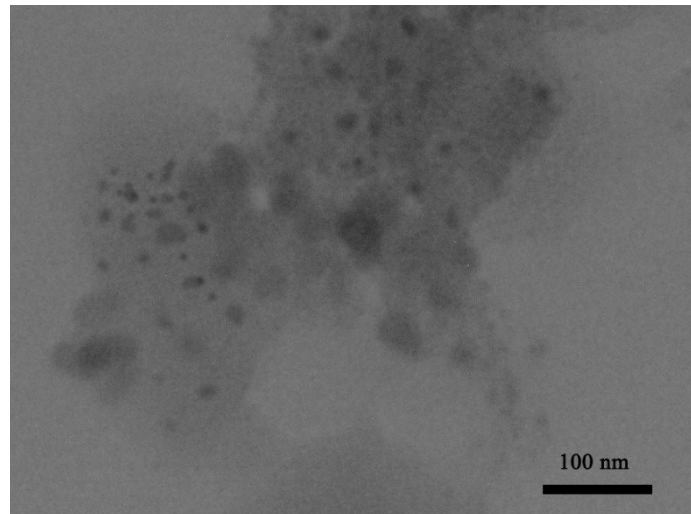

Fig S2 TEM micrograph of the recovered catalyst

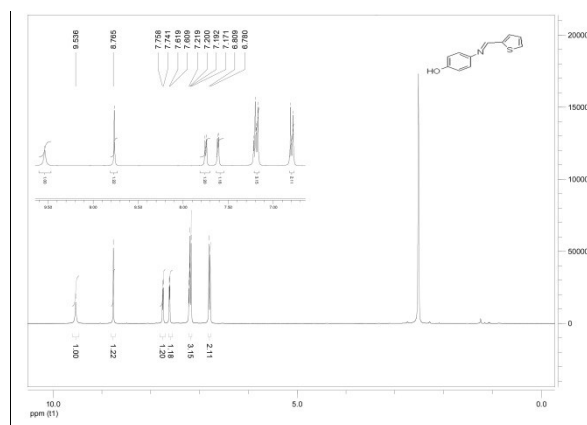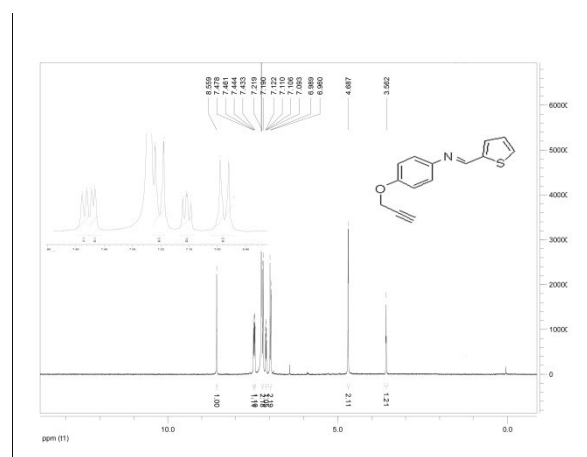

## **<sup>1</sup>H-NMR, FT-IR and boiling points of some biaryl derivatives**

### ***Data section***

#### **4-nitrobiphenyl**

White solid, melting point: 88°C

<sup>1</sup>H-NMR (400MHz, CDCl<sub>3</sub>, ppm, TMS): δ = 8.3 (d, *J*= 8.7Hz, 2H), 7.7 (d, *J*= 8.7 Hz, 2H), 7.65 (dd, *J*= 1.8, 5.4Hz, 2 H), 7.55-7.40 (m, 3H).

FT-IR (KBr, cm<sup>-1</sup>): ν = 3363, 3242, 1596, 1513, 1351, 853, 739, 711

---

#### 4-Acetylbiphenyl

White solid, melting point: 121°C

<sup>1</sup>H NMR (400 MHz, CDCl<sub>3</sub>, ppm, TMS): δ = 8 (d, J=8.4 Hz, 2H), 7.66 (d, J= 8.4 Hz, 2H), 7.59-7.61 (m, 2H), 7.37-7.46 (m, 3H), 2.61(s, 3H)

FT-IR (KBr, cm<sup>-1</sup>): ν = 2918, 1726, 1669, 1410, 1268, 1120, 768, 690, 591

---

#### 4-Methoxybiphenyl

White solid, melting point 87 °C:

<sup>1</sup>H NMR (400 MHz, CDCl<sub>3</sub>, ppm, TMS): δ = 7.50-7.54 (m, 4H), 7.39 (t, J= 7.2 Hz, J=8 Hz, 2H), 7.28(t, J=8 Hz, J=6.8 Hz, 1H), 6.96 (d, J= 8.8, 2H), 3.83(s, 3H)

IR (KBr, cm<sup>-1</sup>): ν = 3073, 2963, 2836, 1722, 1578, 1486, 1287, 1247, 1032, 819, 612, 507

---

#### 2-Acetylbiphenyl

<sup>1</sup>H NMR (400 MHz, CDCl<sub>3</sub>, ppm, TMS): δ = 8.11(t, J=1.6 Hz, J= 2Hz, 1H), 7.87(d, J=7.6 Hz, 1H), 7.73(d, J=8.4Hz, 1H), 7.55(d, J=6.8Hz, 2H), 7.48(t, J=8Hz, J=7.6Hz, 1H), 7.40(t, J=7.2Hz, J=7.6 Hz, 2H), 7.33(d, J=7.2, 1H)
